# Supplementary material
Source: PubMed Central journal article supplement (PMC2688711)
Supplement: NIHMS104835-supplement-1.pdf [file NIHMS104835-supplement-1.pdf]

**Supplementary Figure 3. Specificity of TNF $\alpha$  to promote the clustering of NR1<sub>S896</sub> into lipid rafts.** **A.** TNF $\alpha$  did not alter the total number of NR1 phosphorylated on serine 890 (NR1<sub>S890</sub>) that colocalized with GM1 at any time during the 5 min stimulation period. Numbers of GM1, NR1<sub>S890</sub> and dual positive regions are shown. **B, C.** Quantitative summaries of the number of GM1+, NR1<sub>S896</sub>+ and dual positive regions present on dendritic branches following a 0 - 5 min treatment with vehicle, IL-1 $\beta$  or IL-6. IL-1 $\beta$  or IL-6 did not alter the number of GM1, NR1<sub>S896</sub> or colocalized NR1<sub>S896</sub> and GM1 during the 5 min test period.
