# Supplementary material
Source: PubMed Central journal article supplement (PMC2688711)

A

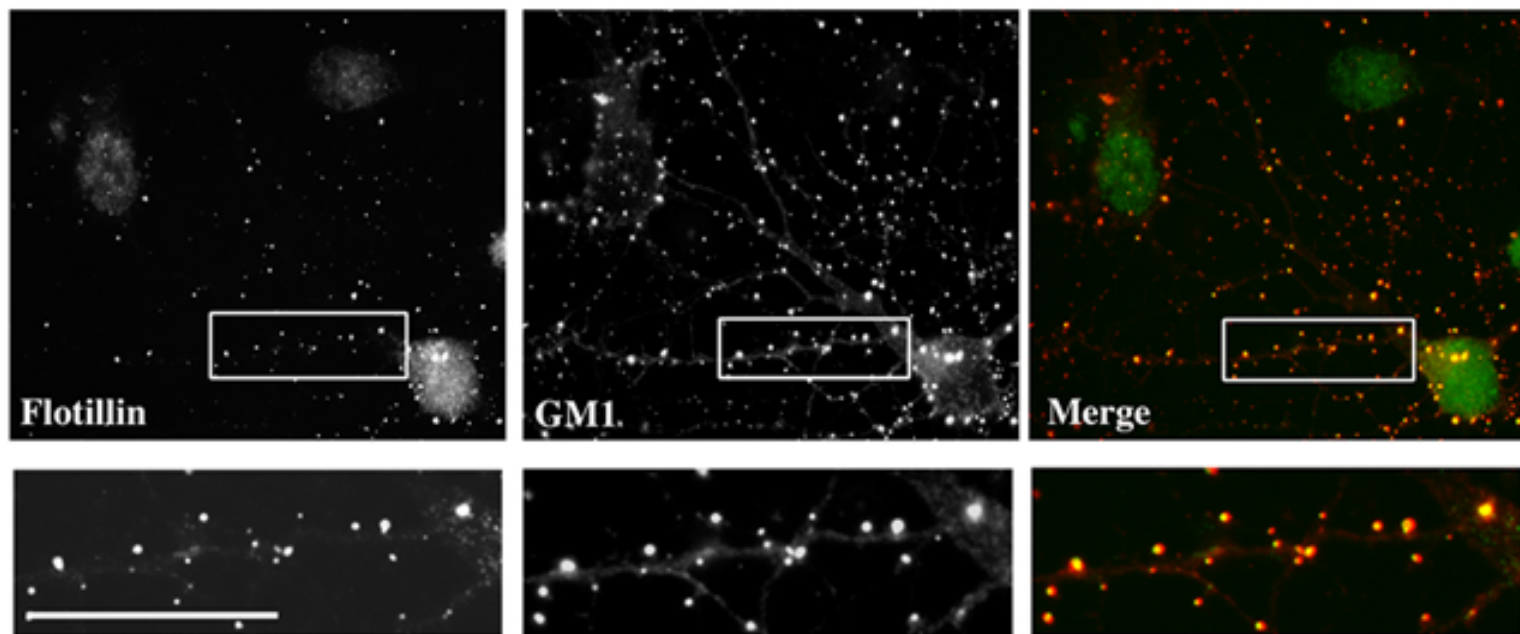

B

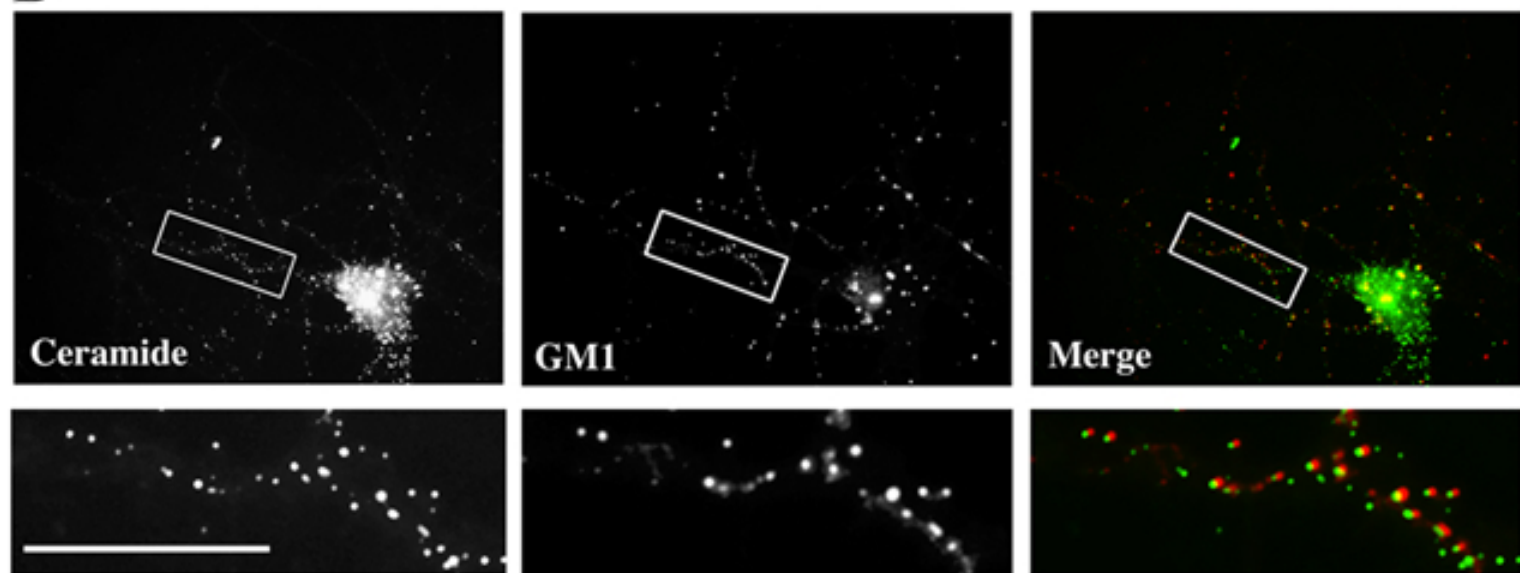

Supplement: NIHMS104835-supplement-Supp_Fig_1.pdf [file NIHMS104835-supplement-Supp_Fig_1.pdf]
